# Supplementary material for: Alteration in yield and oil quality traits of winter rapeseed by lodging at different planting density and nitrogen rates
Source: PubMed Central journal article supplement (PMC5766575; doi:10.1038/s41598-017-18734-8), 2018-01-12
Supplement: 41598_2017_18734_MOESM1_ESM.pdf [file 41598_2017_18734_MOESM1_ESM.pdf]

# **Alteration in yield and oil quality traits of winter rapeseed by lodging at different planting density and nitrogen rates**

Shahbaz Khan<sup>1,a</sup>, Sumera Anwar<sup>1,a</sup>, Jie Kuai<sup>1</sup>, Ali Noman<sup>2</sup>, Muhammad Shahid<sup>1</sup>, Mairaj Din<sup>3</sup>, Ahmed Ali<sup>1</sup>, Guangsheng Zhou<sup>1,\*</sup>

**Affiliation** <sup>1</sup>College of Plant Science and Technology, Huazhong Agricultural University, Wuhan, Hubei Province, P.R. China

<sup>2</sup>Government College University, Faisalabad, Pakistan

<sup>3</sup>College of Resources and Environment, Huazhong Agricultural University, Wuhan, Hubei Province, P.R. China

<sup>a</sup>Equal contribution

\*Correspondence: zhougs@mail.hzau.edu.cn

**Table S1**

Soil fertility in field experiments conducted in Wuhan, Hubei Province, China, during the growing seasons of 2014-2017.

| Soil samples collected | Texture        | pH   | Organic matter (g kg <sup>-1</sup> ) | Available N (mg kg <sup>-1</sup> ) | Available P (mg kg <sup>-1</sup> ) | Available K (mg kg <sup>-1</sup> ) | Total N (%) | Total P (%) | Total K (%) |
|------------------------|----------------|------|--------------------------------------|------------------------------------|------------------------------------|------------------------------------|-------------|-------------|-------------|
| 2014/15                | silt clay loam | 6.20 | 8.51                                 | 62.5                               | 9.80                               | 145                                | 0.06        | 0.03        | 1.10        |
| 2015/16                | silt clay loam | 6.15 | 8.01                                 | 64.5                               | 9.81                               | 148                                | 0.07        | 0.03        | 1.11        |
| 2016/17                | silt clay loam | 6.22 | 8.40                                 | 72.4                               | 10.30                              | 145                                | 0.09        | 0.04        | 1.40        |

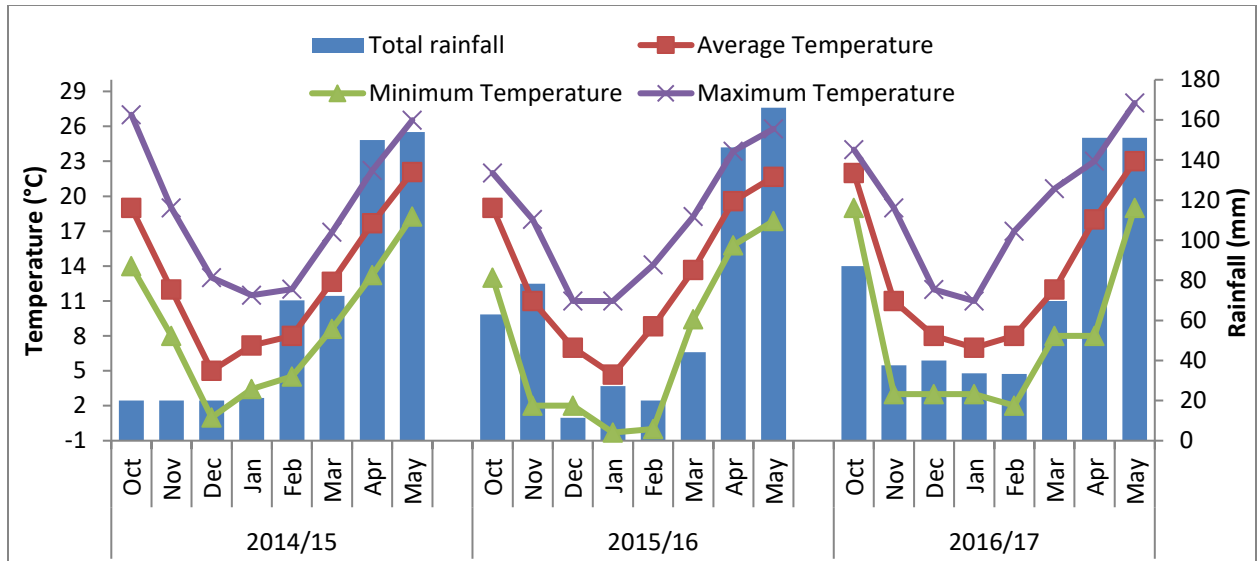

**Figure S1.** Monthly total rainfall and monthly temperature during the crop growing season in the experiment conducted during 2014-2017.

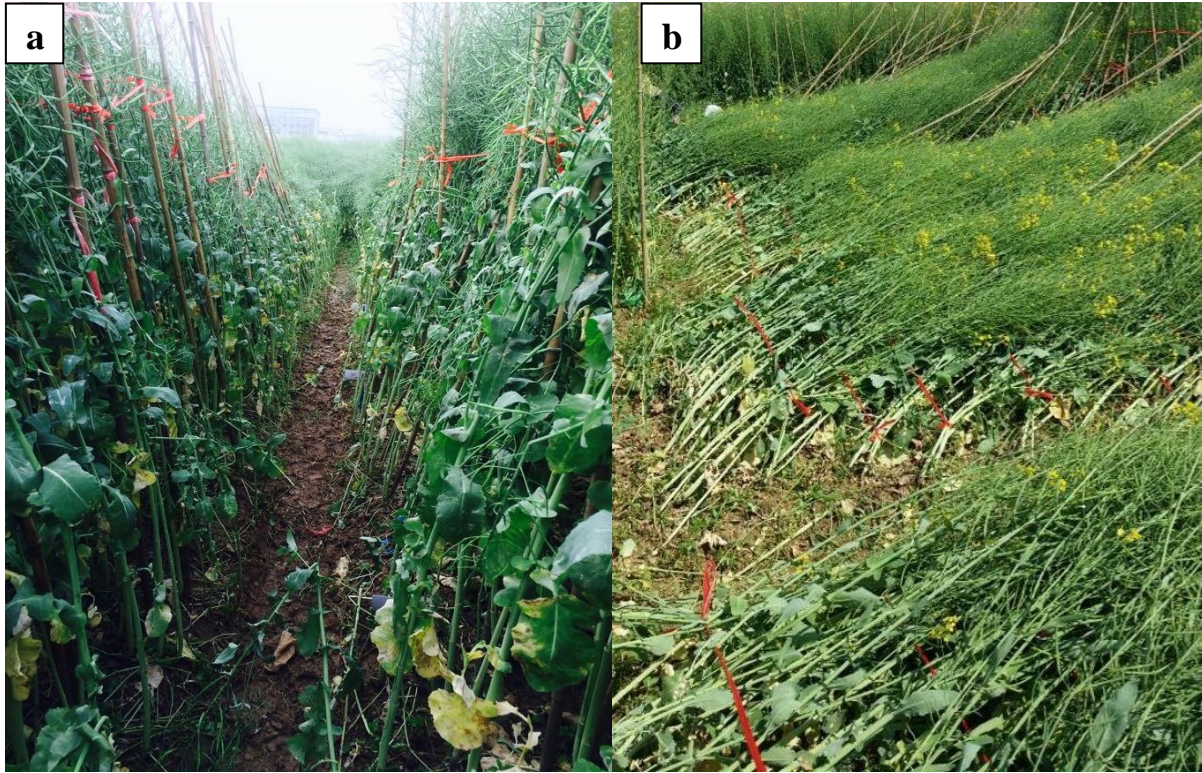

**Figure S2.** The induction of different artificial lodging angles during field trial of rapeseed at Huazhong Agricultural University, a) supported control, b) lodged plants
